# Supplementary material for: Hazard assessment and hydrodynamic, morphodynamic, and hydrological response to Hurricanes Gamma and Delta, on the northern Yucatan peninsula
Source: Copernicus journal article supplement (doi:10.5194/nhess-2022-113), 2022-04-06
Supplement: Supplementary file [file nhess-2022-113-AC1-supplement.pdf]

Response to Anonymous Referee #1 comments:  
Hazard assessment and hydrodynamic, morphodynamic, and hydrological response to Hurricanes  
Gamma and Delta, on the northern Yucatan peninsula (MS No.: nhess-2022-113)  
Alec Torres-Freyermuth et al.

## Introduction

The problem is clearly defined. It is pertinent and relevant. However, a contextualization of the international context is not made. Although the geographical area where hurricanes occur is limited, it would be necessary to relate (in a very concise way) what approximations or advances have been obtained in such areas.

**RESPONSE:** We thank the reviewer for pointing out the need to highlight the relevance of the present work. Significant advances have been achieved in recent decades regarding hurricane research. While Emanuel (2021) found an increased frequency of tropical cyclones in the North Atlantic, there is no clear trend in the increase of tropical cyclone frequency due to climate change. Nevertheless, most studies find an increased proportion of the most extreme events (i.e., categories 4 and 5 on the Saffir Simpson scale) in the context of climate change (Knutson et al., 2020), increasing the associated hazards by the second half of the century. Furthermore, a poleward migration of the location of the maximum lifetime intensity of tropical cyclones has been found (Kossin, 2014), as well as an increase in rapid intensification (Bhatia et al., 2019; Emanuel, 2017), increasing the hazards from tropical cyclones in higher latitudes and hence representing a challenge for emergency management. Regarding the impacts of hurricanes in coastal areas, recent studies have pointed out the need to investigate storm impacts from an interdisciplinary point of view (Camelo and Tamayo, 2021). Considering the importance of numerical modelling for the development of early warning systems and emergency management plans, an improvement in the understanding of the feedback between terrestrial-atmospheric-oceanic processes needs to be incorporated into the numerical models to estimate their impacts in coastal areas. This is a challenging task for a low-lying (karstic) coast where the groundwater aquifer discharges towards the coast. In summary, progress in the understanding of climate change effects on the geographical distribution of hurricanes and the importance of conducting interdisciplinary research to improve predictive tools will be highlighted in the revised manuscript.

## Study Area

For the general contextualization of the study, basic oceanographic information of the study area should be included: regime and range of tides, predominant wave regime, predominant coastal circulation, among other relevant factors.

**RESPONSE:** We agree that this section should be improved with a better description of the environmental characteristics. The mean sea level presents a seasonal variability ascribed to alongshelf currents in the western Gulf of Mexico and low-frequency atmospheric pressure variability (Zavala-Hidalgo et al., 2003). The tidal regime in the study area is diurnal microtidal, with a spring tidal range of 0.75 m (Valle-Levinson et al., 2011). The study area is characterized by intense sea breeze events (Figueroa et al., 2014) and winter storms (fall-winter) associated with Central American Cold Surge Events (Medina-Gómez & Herrera-

Silveira, 2009; Kurzcyn et al., 2020). Typical winter storm wave conditions reach  $H_s > 2$  m and  $T_p > 8$  s from the NNW. Sea breezes drive low-energy high-angle short-period waves ( $H_s < 1$  m,  $T_p = 3.5$  s, NE) that drive a persistent westward alongshore current (Torres-Freyermuth et al., 2017). Across the Yucatán shelf, winds and mesoscale circulation are responsible for driving the currents mainly toward the west (Enriquez et al., 2010; Torres-Freyermuth et al., 2017).

## Materials and Methods

What would be the expected accuracy for the DGPS? And in turn, based on this value, what would be the value of the error associated with the estimation of the beach profiles?

RESPONSE: The DGPS employed Real Time Kinematics (RTK) with a horizontal and vertical accuracy of 0.010 and 0.020 m, respectively, as reported by the manufacturer. Additionally, we carried out a test to assess the accuracy of the method employed by comparing elevation measurements taken along a straight line on a parking lot with the GPS rover fixed on a pole with a bubble level vs carrying the GPS rover in a backpack by two different users (see Figure 1). Maximum differences in the vertical measurements were less than 0.04 m. Therefore, we expect that the maximum error associated with estimating the beach profiles' elevation is of that magnitude.

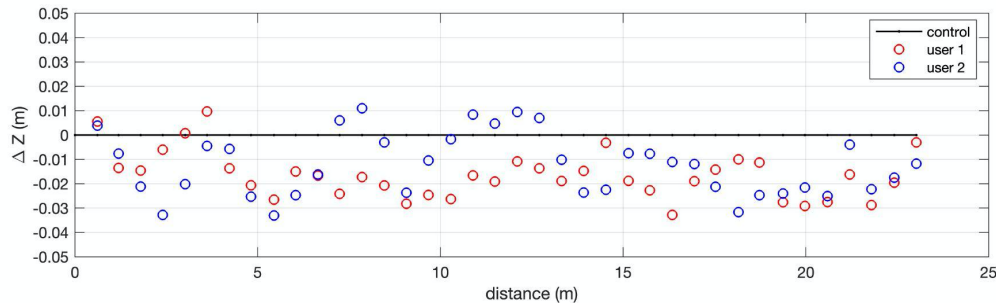

Figure 1. Elevation measurements using a GPS rover fixed on a pole with a bubble level (control) vs. measurements carrying the rover in a backpack by two different users.

What is the spatial resolution of the pixels of the video camera system? What was the result of the calibration of this system?

RESPONSE: The spatial resolution of the different components of this camera system has been previously described by Arriaga et al. (2022). Given that here we are interested mainly in coverage, this result has to be translated into areas. For example, along the shoreline near the cameras (300 m easting), a pixel translates to an area of  $0.01 \text{ m}^2$ . Around 1400 m easting, a pixel covers an approximate size of  $2.5 \text{ m}^2$ . Finally, at the farthest point, near the pier, the resolution is in the order of  $10 \text{ m}^2$ . The calibration performed following Simarro et al. 2017, particularly the simplified mathematical model referred to as M2 in Simarro et al. 2020, resulted in an average reprojection error of 0.7 pixels.

Table 1. Sampling time? Or interval sampling?

RESPONSE: The Table has been revised accordingly by replacing “Sampling time” with “Sampling interval.”

LUCL was defined previously?

RESPONSE: Thank you for the observation. LULC means WRF Land Use and Land Cover (LULC) soil category maps. The definition will be included in the revised manuscript.

Why were only the results at 24h, 48h, and 72h considered?

RESPONSE: It is known that a tropical cyclone’s track and intensity forecast degrades rapidly, so it is not reliable beyond 72 hours. Despite the performance of the forecasts being acceptable for this particular case (see Table 1), it was not considered for discussion. The National Hurricane Center Forecast Verification Report ([https://www.nhc.noaa.gov/verification/pdfs/Verification\\_2020.pdf](https://www.nhc.noaa.gov/verification/pdfs/Verification_2020.pdf)), 2020 Hurricane Season, shows the error in forecasts can vary significantly from year to year due to the interannual variability of the atmosphere. According to the NHC 2020 forecasts (see Figure 2), the average error of a tropical cyclones’ intensity is observed as a function of the forecast time.

Table. Correlation Coefficients of 24 to 120 hrs forecasts.

| Variables               | Correlation Coefficient |        |        |        |         |
|-------------------------|-------------------------|--------|--------|--------|---------|
|                         | 24 hrs                  | 48 hrs | 72 hrs | 96 hrs | 120 hrs |
| Temperature             | 0.58                    | 0.40   | 0.39   | 0.43   | 0.44    |
| Wind Speed              | 0.81                    | 0.69   | 0.56   | 0.50   | 0.28    |
| Wind Direction          | 0.66                    | 0.50   | 0.24   | 0.19   | 0.04    |
| Atmospheric Pressure    | 0.93                    | 0.70   | 0.56   | 0.44   | 0.38    |
| Significant Height (Hs) | 0.94                    | 0.77   | 0.64   | 0.51   | 0.32    |
| Hs Direction            | 0.67                    | 0.63   | 0.58   | 0.40   | 0.14    |
| Sea Level               | 0.64                    | 0.46   | 0.38   | 0.20   | 0.01    |

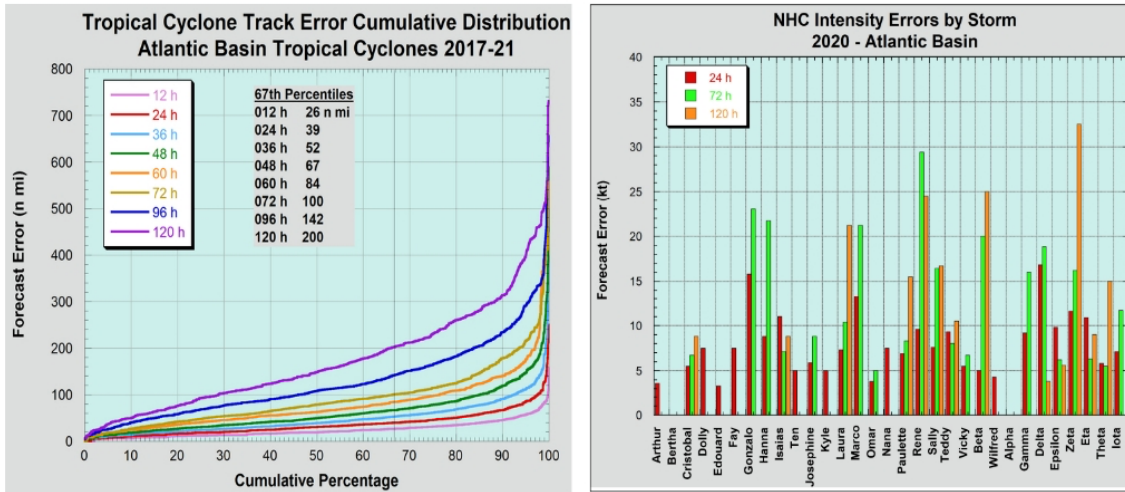

Figure 2. (Left panel) Cumulative distribution of five-year official Atlantic basin tropical cyclone track forecast errors (<https://www.nhc.noaa.gov/verification/verify4.shtml>). (Right panel) 2020 NHC official intensity errors for all tropical cyclones at 24, 72, and 120 h ([https://www.nhc.noaa.gov/verification/pdfs/Verification\\_2020.pdf](https://www.nhc.noaa.gov/verification/pdfs/Verification_2020.pdf)).

## Results

Pag. 12 -Paragraph 300. The sentence “promoting a sea-level set down ( $\Delta n$ ) of 0.43 m associated with Gamma and a 0.30 m set up during delta” is not completely clear for me considering the scale displayed in the Fig. 2a (36 – 51 cm).

RESPONSE: We apologize for the lack of clarity in the figure/text in this section. The scale displayed is between -36 to +51 cm (86 cm total). The revised text should read:

“*promoting a sea-level set up ( $\Delta n$ ) of 9 cm associated with Gamma and a 30 cm set up during Delta.*” This information will be included in the revised manuscript.

Paragraph 325. Regarding the latent heat ( $Q_e$ ), why are the high values that occur at the end of the time series (10/25/2020) not also mentioned? What factors or phenomena could be associated to these values?

RESPONSE: Latent Heat is the flux of energy carried by evaporated water. October is part of the rainy season for the region, where moisture condenses into rain drops, forming clouds and taking latent heat from the ocean's surface. Therefore, we believe that cloud formation could be associated with higher values at the end of the time series.

What is the unit of the x-axis in Figure 4.a.1? Furthermore, considering Figure 4 and its explanation, the value of 80% for flow towards the west seems excessive. How did you calculate and verify this value?

RESPONSE: The x-axis in Figure 4.a.1 is the same as in Figure 4.b (i.e., dates). The period shown in Figure 4 may be misleading for westward flow. The currents of the Yucatan Peninsula are predominantly westward. The value of 80% was calculated considering the three years time series (which included the hurricane events), during which a zonal

component showed a negative flow (ie. towards the west). This clarification will be included in the revised manuscript.

The editing of Figure 6 is confusing. In subset 1, the area that is presented in detail in subset 2 should be boxed. For example, the jetty is mentioned in the text, but I could not locate it in this figure.

RESPONSE: The figure has been revised following the reviewer's suggestions. Notice that the port's jetty is located on the left side of both subsets as a reference.

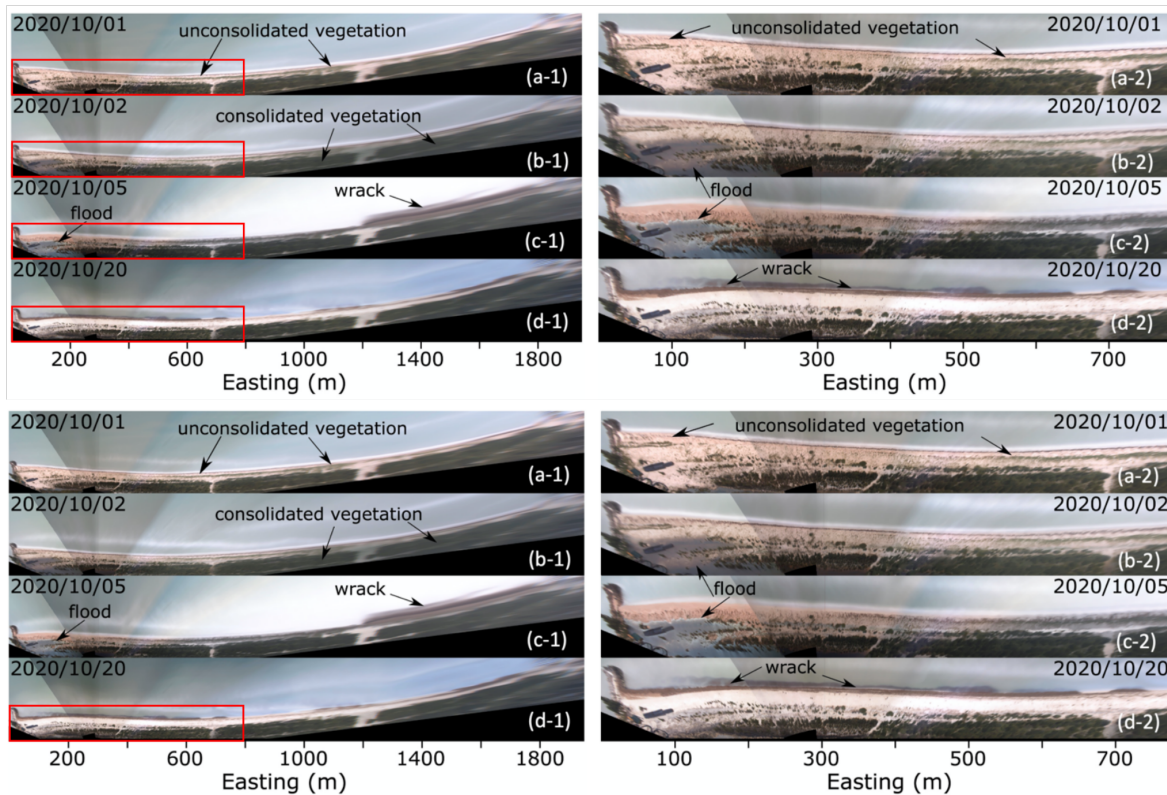

Figure 3. Rectified images from the video monitoring system showing a (1) 1950 m and (2) 780 m stretch of Sisal beach for (a) 2020/10/01, (b) 2020/10/02, (c) 2020/10/05, and (d) 2020/10/20. Images taken from: <http://tepu.sisal.unam.mx/>

Coastal Aquifer. The increase in the water table is not as noticeable in W5 and W7. Probably due to a figure scale issue. How could the edition of the figure be improved so that this increase can be clearly observed?

RESPONSE: The figure has been revised accordingly to highlight the increase in the water table at monitoring wells W5 and W7. We increased the period (08/01/2020-10/30/2020) so that the impact in the aquifer could be best observed (see Figure 4 below). As the reviewer pointed out, the changes in W7 and W5 are not as significant as in W4, where the maximum



increase is about 0.5 m. However, there was also a decrease in the amplitude of the measured tides at the wells caused by the increase in aquifer discharge.

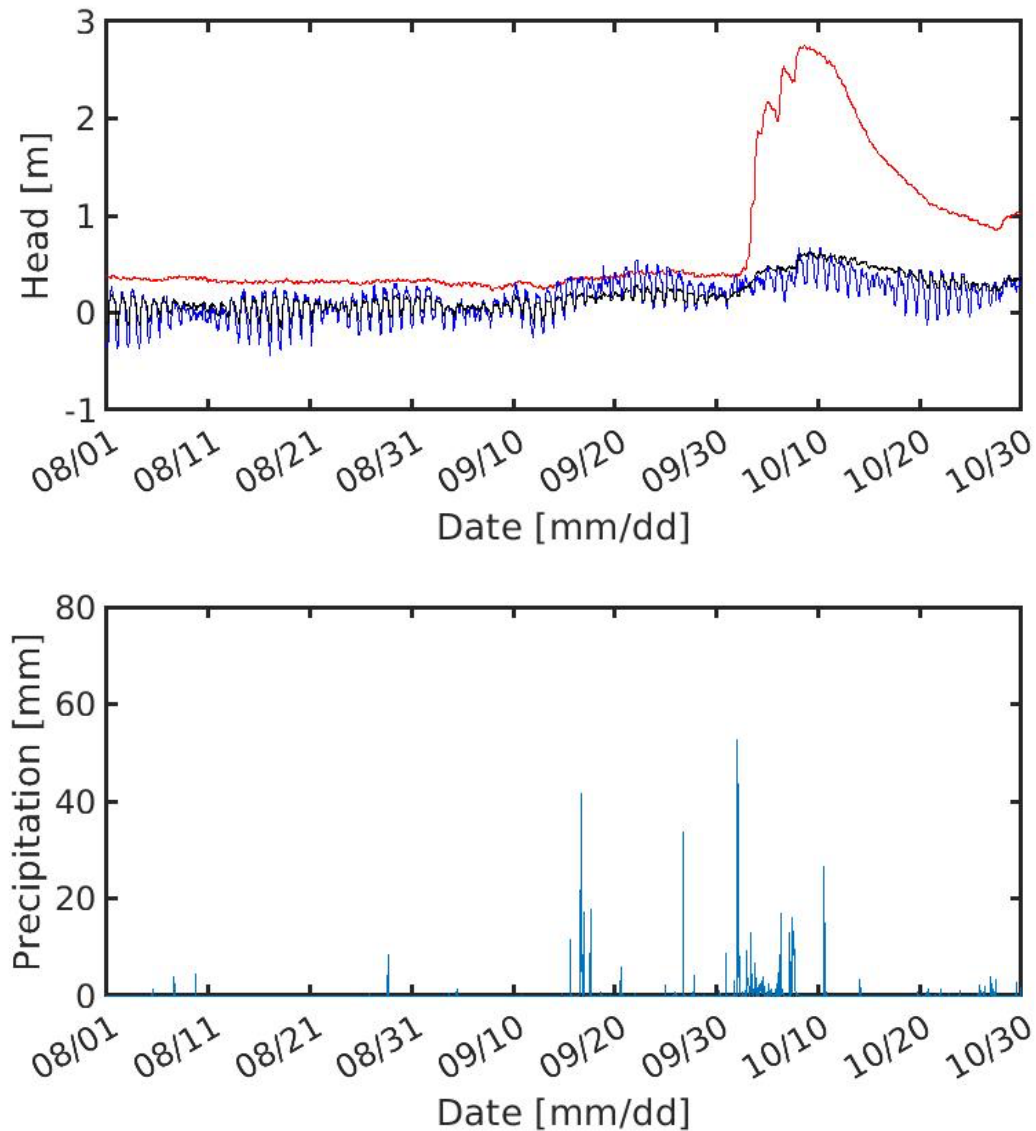

Figure 4. Times series of (a) the hydraulic head at three coastal monitoring wells (W4: solid black line; W5: black dotted line; W7a: solid gray line), and (b) precipitation at the RUOA meteorological station in Sisal, Mexico.

Therefore, the text from Section 4.2.3 will be revised as follows:

*“Monitoring wells W4, W5, and W7a located 20 km, 5 km, and 200 m from the coast, respectively, provide information on the oceanic and terrestrial forcing on the coastal aquifer. Figure 10 shows the relative levels of the hydraulic head at each well and the precipitation at Sisal. Wells W7a, and W5 show the diurnal tidal modulation on the hydraulic head (Figure 10a). All wells show an increase in the water table owing to the recharge*

*following the storms. This is more evident at the well located 20 km from Sisal (W4), which shows an increase of more than 2 m following the passage of Gamma and Delta, reaching a maximum level on October 7. It is worth noting that coastal wells W5 and W7a do not show such an increase in the water table due to confined aquifer conditions that do not allow rapid infiltration of the precipitation (Figure 10b); however, the storm effects can be seen in the change in amplitude (decrease) of the tide caused by the increase in aquifer discharge. The southern limit of such confinement is not well known, hence back-barrier flooding might occur when the water table exceeds the confinement level south of the aquifer, preventing the hydraulic head in well W7a and W5 from increasing further (Perry, 1989; Pino 2011)."*

Forecast modelling. There is a mention of statistical fit, less bias and significantly high correlation. But the p-value is not presented to support these claims. The correlation (C) is the same correlation coefficient (r)? If so, wouldn't it be more appropriate to use this denomination?

RESPONSE: Thank you for your observations. The manuscript has been revised, replacing "correlation" by "correlation coefficient". Regarding the statistical parameters, a new Table will be included in the manuscript to illustrate our results (Table1).

Table 1. Statistical parameters at the 5% significance level. df: degree of freedom; sd: standard deviation; ci: confidence interval.

| Variables               | t-test | df | sd   | p-value | ci   |      |
|-------------------------|--------|----|------|---------|------|------|
| Temperature             | 13.17  | 4  | 0.08 | 0.0001  | 0.35 | 0.54 |
| Wind Speed              | 6.29   | 4  | 0.20 | 0.003   | 0.32 | 0.82 |
| Wind Direction          | 2.96   | 4  | 0.25 | 0.042   | 0.02 | 0.64 |
| Atmospheric Pressure    | 6.14   | 4  | 0.22 | 0.004   | 0.33 | 0.88 |
| Significant Height (Hs) | 6.01   | 4  | 0.24 | 0.004   | 0.34 | 0.93 |
| Hs Direction            | 4.99   | 4  | 0.22 | 0.008   | 0.22 | 0.75 |
| Sea Level               | 3.12   | 4  | 0.24 | 0.036   | 0.04 | 0.64 |

## Discussion

The discussion is excessively short and does not cover essential aspects of the manuscript.

RESPONSE: We thank the reviewer for pointing out this issue. All the reviewer's comments are considered for the revised version of the manuscript. See responses below.

For example, what would be the main limitations of the approach used? particularly numerical modeling?

RESPONSE: The numerical modelling presents limitations in forcing and incorporating terrestrial and atmospheric processes. The spatial and temporal resolution for the wind field associated with the storm passage is not high enough to capture the hydrodynamic response near the coast for such events that move/travel offshore. On the other hand, field observations suggest that the flooding on the barrier island's lee side was associated with the high precipitation and the increase in the water table. These two aspects were not incorporated into the numerical models. We believe that water level measurements in the wetlands would provide greater insights into the importance of precipitation in the flooding of the barrier island.

What effect does the error associated with topographic measurements (i.e. bathymetry, beach profiles, DTM) have on the overall results of the study?

RESPONSE: The uncertainty in the topography and bathymetry is important for the model implementation since it controls wave transformation and coastal flooding. However, we found that our DGPS measurement errors are significantly smaller than the observed changes in the beach and hence do not affect the conclusions reached in the present study.

If the geographic location of the population with respect to the path of the hurricanes seems to be a crucial factor in the adverse effects, as indicated at the end by including a comparison with another place, why was this approach not included in the experimental design?

RESPONSE: We agree that the geographical location can play an important role in the observed impact. In the present work, we focus on obtaining high-resolution measurements that can help to calibrate numerical models that can be implemented in other areas. However, we believe that comparing field observations with other places along the northern Yucatan coast warrants future studies.

It was also repeatedly mentioned that anthropic structures marked the transition in morphological changes; then, could it be said that if the structures did not exist, the changes would be more moderate?

RESPONSE: We believe the impact of the structures is quite important in the study area as confirmed by aerial images and in situ observations over the past few years. Observed morphological changes are significantly smaller at beach profiles located away from the structures. Therefore, it is likely that, as the reviewer points out, if the structures did not exist, extreme changes would be more moderate.

Would these morphological changes be permanent (long-term) or temporary?

RESPONSE: We agree that this is an important aspect that can be addressed with our beach profile measurements. To investigate this, we analyzed the beach morphology changes occurring during the following year after the storm passage (Figure 5). It was found that some morphological features remained, such as the increase in the beach elevation in some areas, whereas other changes smoothed out during the winter storm season. Moreover, the beach evolution presented significant alongshore differences including a net volume gain (P16), fast recovery (P7), and a slow recovery (P20) after the storm passage (see Figure 5b).



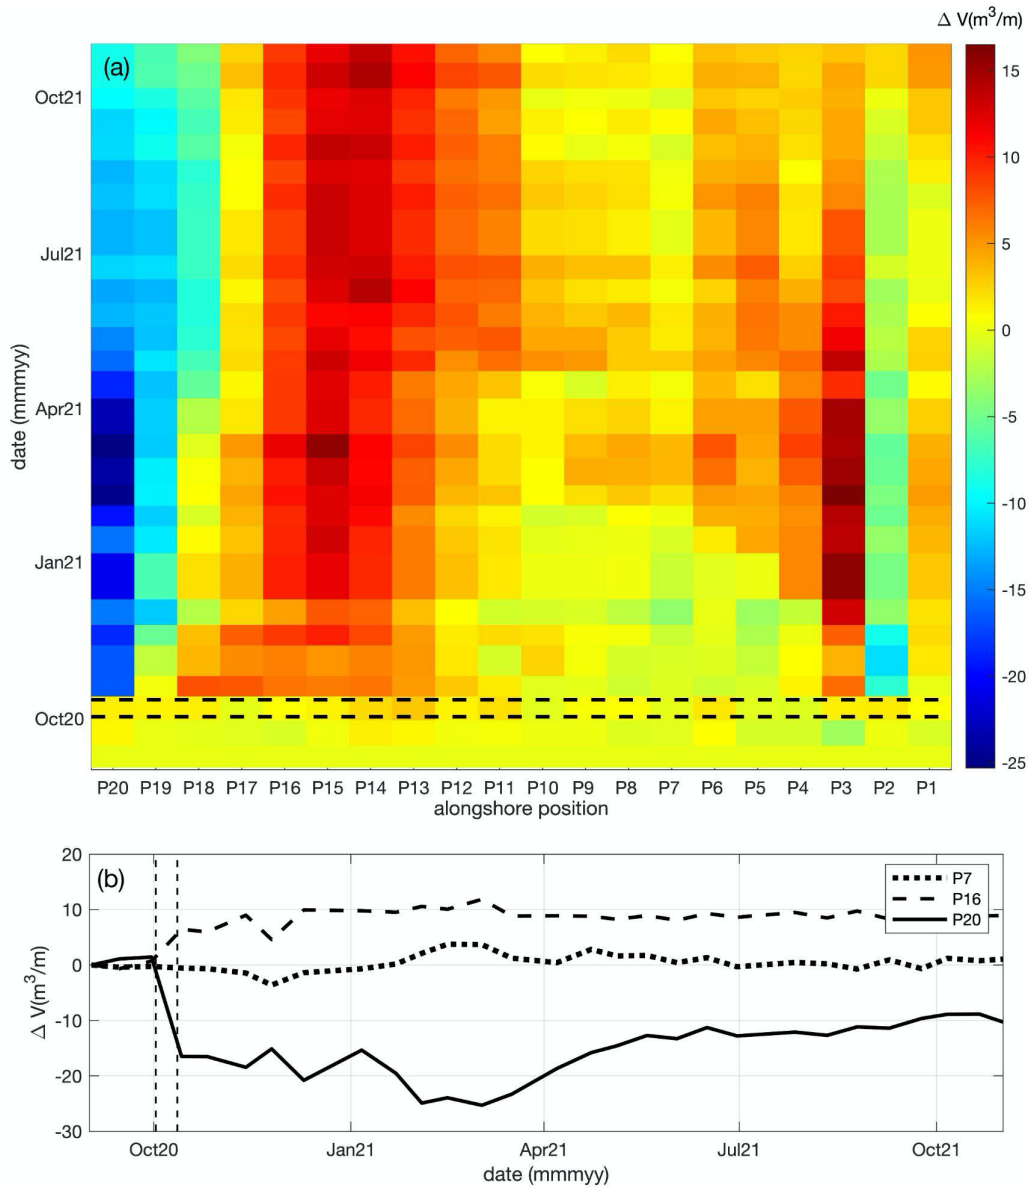

Figure 5. (a) Volume change evolution for each beach profile indicating the storm period for Gamma and Delta (dashed lines) and (b) time series of volume change for selected transects with different post-storm behavior (P7-stable, P16-accretion, P-20-erosion/recovery).

Therefore, the discussion must be expanded and restructured, so that the most relevant aspects of the manuscript are addressed.

RESPONSE: Following the reviewer's comments, the Discussion section has been restructured in the revised manuscript to include the aforementioned points raised by the reviewer.

## REFERENCES:

Bhatia, K. T., Vecchi, G. A., Knutson, T. R., Murakami, H., Kossin, J., Dixon, K. W., & Whitlock, C. E. (2019). Recent increases in tropical cyclone intensification rates. *Nature Communications*, 10(1), 1–9. <https://doi.org/10.1038/s41467-019-08471-z>

Emanuel, K. (2017). Will global warming make hurricane forecasting more difficult? *Bulletin of the American Meteorological Society*, 98(3), 495–501. <https://doi.org/10.1175/BAMS-D-16-0134.1>

Emanuel, K. (2021). Atlantic tropical cyclones downscaled from climate reanalyses show increasing activity over past 150 years. *Nature Communications*, (1), 1–8. <https://doi.org/10.1038/s41467-021-27364-8>

Kossin, J. P., Emanuel, K. A., Vecchi, G. A. (2014). The poleward migration of the location of tropical cyclone maximum intensity. *Nature*, 509(7500), 349–352. <https://doi.org/10.1038/nature13278>

Kossin, J. P., Emanuel, K. A., Vecchi, G. A. (2014). The poleward migration of the location of tropical cyclone maximum intensity. *Nature*, 509(7500), 349–352. <https://doi.org/10.1038/nature13278>
