# Supplementary material for: Hazard assessment and hydrodynamic, morphodynamic, and hydrological response to Hurricanes Gamma and Delta, on the northern Yucatan peninsula
Source: Copernicus journal article supplement (doi:10.5194/nhess-2022-113), 2022-04-06
Supplement: Supplementary file [file nhess-2022-113-AC2-supplement.pdf]

Response to Anonymous Referee #2 comments:  
Hazard assessment and hydrodynamic, morphodynamic, and hydrological response to Hurricanes  
Gamma and Delta, on the northern Yucatan peninsula (MS No.: nhess-2022-113)  
Alec Torres-Freyermuth et al.

The manuscript describes the results of a study on the effects and impacts of windstorms Delta and Gamma, on a barrier island near the Yucatan coast through analyses of environmental, morphological, anthropogenic, and ecological observations.

Overall the manuscript presents an impressive amount of data analyses. It provides fresh insight into the very critical aspects of parameters are collectively influenced by the storms and play significant roles in how barrier islands respond to extreme coastal events.

RESPONSE: We thank the reviewer for his/her comments.

My comments are minor:

1. English language here and there needs grammatical corrections. Please run the entire manuscript through copy editing and make sure there are no errors.

RESPONSE: The manuscript will be thoroughly revised by a native English speaker and a professional editorial service to ensure no errors in the revised version.

2. All symbols need to be defined, for instance, parameters noted in Line 132 are not defined.

RESPONSE: Thank you for pointing out this issue. We have ensured that all symbols are defined in the revised version.

3. Line 134, why the low band is chosen to be 1/48? Why not 1/24?

RESPONSE: To ensure that the tidal signal is eliminated from the ADCP measurements, we decided to cut the data at all frequencies higher than 48 hours. Cutting at 24 hours leaves some information from the tidal signal based on our experience.

4. Some tables are distorted such as Table 3.

RESPONSE: The format of all tables has been revised and homogenized.
